# Supplementary material for: Theoretical investigation of the effects of various substituents on the large energy gap between triplet excited-states of anthracene
Source: PubMed Central journal article supplement — RSC Adv. 2018 Aug 6;8(49):27979–87. doi: 10.1039/c8ra04264k (PMC9083491; doi:10.1039/c8ra04264k), 2018-08-06
Supplement: RA-008-C8RA04264K-s001.pdf [file RA-008-C8RA04264K-s001.pdf]

Supporting Information

*RSC Advances*

## **Theoretical investigation of the anthracene and its derivatives on large energy gap between triplet excited-states**

*Dawei Yu,<sup>a</sup> Xiaojuan Zhang,<sup>a</sup> Zhiming Wang,<sup>c</sup> Bing Yang<sup>b</sup> Yuguang Ma<sup>c</sup> and Yuyu Pan,\**

<sup>a</sup>School of Petrochemical Engineering, Shenyang University of Technology, 30 Guanghua Street, Liaoyang, 111003, P. R. China;

<sup>b</sup>State Key Laboratory of Supramolecular Structure and Materials, Jilin University, Changchun, 130012, P. R. China.

<sup>c</sup>State Key Laboratory of Luminescent Materials and Devices, Institute of Polymer Optoelectronic Materials and Devices, South China University of Technology, Guangzhou, 510640, P. R. China

Tel: +86 15140996671;

E-mail: [pyy39518768@163.com](mailto:pyy39518768@163.com)

### **Contents**

**SI-1:** The important bond lengths and dihedral angle of anthracene and its derivatives molecules in the ground-state ( $S_0$ ).

**SI-2:** The HOMO and LUMO of anthracene and its derivatives molecules.

**SI-3:** The energy of HOMO and LUMO of anthracene and its derivatives molecules.

**SI-1:** The important bond lengths and dihedral angle of anthracene and its derivatives molecules in the ground-state ( $S_0$ ).

|                         | Distance(Å) |        | Dihedral<br>angle (° ) |                             | Distance(Å) |        | Dihedral<br>angle (° ) |
|-------------------------|-------------|--------|------------------------|-----------------------------|-------------|--------|------------------------|
|                         | C1-C2       | C9-C12 | C1-11-12-10            |                             | C1-C2       | C9-C12 | C1-11-12-10            |
| AN                      | 1.3646      | 1.4018 | 180.00                 | -                           | 1.3646      | 1.4018 | 180.00                 |
| 2,NO <sub>2</sub> - AN  | 1.3692      | 1.4013 | 179.99                 | 2,6-2NO <sub>2</sub> - AN   | 1.3685      | 1.4021 | 180.00                 |
| 2,CN-AN                 | 1.3790      | 1.4012 | 180.00                 | 2,6-2CN-AN                  | 1.3788      | 1.4019 | 179.99                 |
| 2,CHO- AN               | 1.3782      | 1.4025 | 179.99                 | 2,6-2CHO- AN                | 1.3782      | 1.4010 | 180.00                 |
| 2,OH- AN                | 1.3726      | 1.4021 | 179.99                 | 2,6-2OH- AN                 | 1.3722      | 1.4015 | 179.99                 |
| 2,OCH <sub>3</sub> - AN | 1.3763      | 1.4035 | 179.97                 | 2,6-2OCH <sub>3</sub> - AN  | 1.3756      | 1.4020 | 179.99                 |
| 2,CH <sub>3</sub> -AN   | 1.3723      | 1.3999 | 179.99                 | 2,6-2CH <sub>3</sub> -AN    | 1.3726      | 1.4017 | 180.00                 |
| 2,Br-AN                 | 1.3664      | 1.4003 | 179.99                 | 2,6-2Br-AN                  | 1.3666      | 1.4007 | 179.99                 |
| 9,NO <sub>2</sub> - AN  | 1.3675      | 1.4109 | 179.20                 | 9,10-2NO <sub>2</sub> - AN  | 1.3675      | 1.4055 | 179.97                 |
| 9,CN-AN                 | 1.3689      | 1.4169 | 179.99                 | 9,10-2CN-AN                 | 1.3646      | 1.4136 | 179.99                 |
| 9,CHO- AN               | 1.3680      | 1.4298 | 178.45                 | 9,10-2CHO- AN               | 1.3690      | 1.4215 | 176.72                 |
| 9,OH- AN                | 1.3698      | 1.4109 | 179.39                 | 9,10-2OH- AN                | 1.3699      | 1.4048 | 178.24                 |
| 9,OCH <sub>3</sub> - AN | 1.3694      | 1.4068 | 179.85                 | 9,10-2OCH <sub>3</sub> - AN | 1.3699      | 1.4060 | 179.69                 |
| 9,CH <sub>3</sub> -AN   | 1.3669      | 1.4052 | 179.73                 | 9,10-2CH <sub>3</sub> -AN   | 1.3696      | 1.4031 | 170.32                 |
| 9,Br-AN                 | 1.3677      | 1.4072 | 179.99                 | 9,10-2Br-AN                 | 1.3678      | 1.4051 | 179.99                 |

SI-2: The HOMO and LUMO of anthracene and its derivatives molecules.

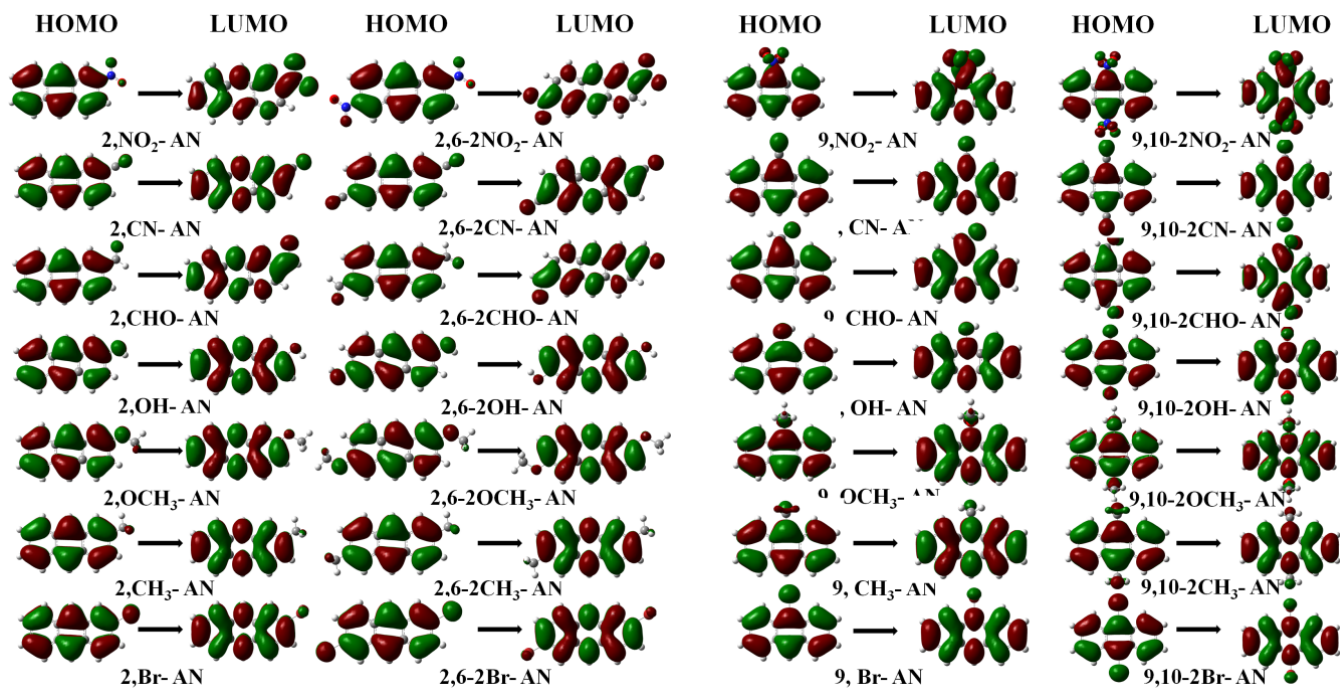

**SI-3:** The energy of HOMO and LUMO of anthracene and its derivatives molecules.

| The energy of frontier molecular orbitals (eV) |       |       |                  |                             |       |       |                  |
|------------------------------------------------|-------|-------|------------------|-----------------------------|-------|-------|------------------|
|                                                | HOMO  | LUMO  | $\Delta E_{H-L}$ |                             | HOMO  | LUMO  | $\Delta E_{H-L}$ |
| AN                                             | -5.52 | -1.97 | 3.55             | -                           |       |       |                  |
| 2,NO <sub>2</sub> - AN                         | -5.83 | -2.61 | 3.22             | 2,6-2NO <sub>2</sub> - AN   | -6.39 | -3.27 | 3.12             |
| 2,CN-AN                                        | -5.74 | -2.28 | 3.46             | 2,6-2CN-AN                  | -6.22 | -2.84 | 3.38             |
| 2,CHO- AN                                      | -5.57 | -2.67 | 2.9              | 2,6-2CHO- AN                | -5.93 | -2.74 | 3.19             |
| 2,OH- AN                                       | -5.07 | -1.59 | 3.48             | 2,6-2OH- AN                 | -4.89 | -1.55 | 3.34             |
| 2,OCH <sub>3</sub> - AN                        | -4.99 | -1.57 | 3.42             | 2,6-2OCH <sub>3</sub> - AN  | -4.75 | -1.52 | 3.23             |
| 2,CH <sub>3</sub> -AN                          | -5.17 | -1.56 | 3.61             | 2,6-2CH <sub>3</sub> -AN    | -5.11 | -1.54 | 3.57             |
| 2,Br-AN                                        | -5.45 | -1.89 | 3.56             | 2,6-2Br-AN                  | -5.64 | -2.12 | 3.52             |
| 9,NO <sub>2</sub> - AN                         | -5.79 | -2.48 | 3.31             | 9,10-2NO <sub>2</sub> - AN  | -6.26 | -3.07 | 3.19             |
| 9,CN-AN                                        | -5.73 | -2.37 | 3.36             | 9,10-2CN-AN                 | -6.23 | -2.99 | 3.24             |
| 9,CHO- AN                                      | -5.63 | -2.40 | 3.23             | 9,10-2CHO- AN               | -5.92 | -3.05 | 2.87             |
| 9,OH- AN                                       | -4.96 | -1.55 | 3.41             | 9,10-2OH- AN                | -5.08 | -1.64 | 3.44             |
| 9,OCH <sub>3</sub> - AN                        | -5.14 | -1.63 | 3.51             | 9,10-2OCH <sub>3</sub> - AN | -5.03 | -1.63 | 3.4              |
| 9,CH <sub>3</sub> -AN                          | -5.12 | -1.55 | 3.57             | 9,10-2CH <sub>3</sub> -AN   | -5.01 | -1.59 | 3.42             |
| 9,Br-AN                                        | -5.39 | -1.91 | 3.48             | 9,10-2Br-AN                 | -5.53 | -2.16 | 3.37             |
